# Supplementary material
Source: PubMed Central journal article supplement (PMC4140474)

# Supporting Information

## UV-Photoelectron Spectroscopy of BN Indoles: Experimental and Computational Electronic Structure Analysis

Anna Chrostowska,<sup>\*,§</sup> Senmiao Xu,<sup>†,‡</sup> Audrey Mazière,<sup>§</sup> Katherine Boknevitiz,<sup>†</sup> Bo Li,<sup>†</sup> Eric R. Abbey,<sup>‡</sup> Alain Dargelos,<sup>§</sup> Alain Graciaa,<sup>§</sup> and Shih-Yuan Liu<sup>†,‡,\*</sup>

<sup>†</sup>*Department of Chemistry, Boston College, Chestnut Hill, MA 02467, United States*

<sup>‡</sup>*Department of Chemistry, University of Oregon, Eugene, Oregon 97403-1253, United States*

<sup>§</sup>*Institut des Sciences Analytiques et de Physico-Chimie pour l'Environnement et les Matériaux,  
UMR CNRS 5254, Université de Pau  
et des Pays de l'Adour, Avenue de l'Université, 64 000 Pau, France*

| <b>Index</b>                                                                                        | <b>page</b> |
|-----------------------------------------------------------------------------------------------------|-------------|
| General                                                                                             | S2          |
| Electrophilic Aromatic Substitution Reaction of <b>I</b> , <b>II</b> and indole (Figure 5, eqs 2-4) | S3-S4       |
| Competitive Electrophilic Aromatic Substitution Reactions (Scheme 2)                                | S5          |
| Supporting UV-PES and Computational Data                                                            | S6-S14      |
| Crystal structure of “fused” BN gramine                                                             | S15-S24     |
| NMR spectra collection                                                                              | S25-S27     |

## General

All oxygen- and moisture-sensitive manipulations were carried out under an inert atmosphere using either standard Schlenk techniques or a glove box.

Et<sub>2</sub>O, CH<sub>2</sub>Cl<sub>2</sub>, and CH<sub>3</sub>CN were purified by passing through a neutral alumina column under argon. All other chemicals and solvents were purchased and used as received. “External” BN indole **I**,<sup>1</sup> “fused” BN indole **II**<sup>2</sup> were prepared according to the literature procedures.

<sup>11</sup>B NMR spectra were recorded on a Varian Unity/Inova 500 spectrometer at ambient temperature. <sup>11</sup>B NMR chemical shifts are externally referenced to BF<sub>3</sub>•Et<sub>2</sub>O ( $\delta$  0). <sup>1</sup>H NMR spectra were recorded on a Varian Unity/Inova 500 spectrometer. <sup>13</sup>C NMR spectra were recorded on a Unity/Inova 600 spectrometer. IR spectra were recorded on a Bruker FTIP Alpha (ATR mode) spectrometer. UV-vis spectra were recorded on a Agilent Cary 100 UV-vis spectrophotometer with concentration 1.0 X 10<sup>-4</sup> M in CH<sub>3</sub>CN.

Cyclic Voltammetry was conducted on a SP-200 Potentiostat using glassy carbon working electrode, Pt coil counter electrode, and Ag wire pseudo-reference. Experiments were performed using 0.1 M tetrabutylammonium hexafluorophosphate (TBAPF<sub>6</sub>) in high purity CH<sub>3</sub>CN, and conducted under N<sub>2</sub> atmosphere. E<sub>ox</sub> values were reported as anodic peak potentials internally calibrated to Fc/Fc<sup>+</sup> standard (E<sub>1/2</sub> = 0.40 V vs. SCE<sup>3</sup> under this conditions). CVs were collected at a sweep rate of 50 mV/s. The analyte concentration was ~ 2 mM.

Complete reference 24:

Gaussian 09, Revision B.01, Frisch, M. J.; Trucks, G. W.; Schlegel, H. B.; Scuseria, G. E.; Robb, M. A.; Cheeseman, J. R.; Scalmani, G.; Barone, V.; Mennucci, B.; Petersson, G. A.; Nakatsuji, H.; Caricato, M.; Li, X.; Hratchian, H. P.; Izmaylov, A. F.; Bloino, J.; Zheng, G.; Sonnenberg, J. L.; Hada, M.; Ehara, M.; Toyota, K.; Fukuda, R.; Hasegawa, J.; Ishida, M.; Nakajima, T.; Honda, Y.; Kitao, O.; Nakai, H.; Vreven, T.; Montgomery, Jr., J. A.; Peralta, J. E.; Ogliaro, F.; Bearpark, M.; Heyd, J. J.; Brothers, E.; Kudin, K. N.; Staroverov, V. N.; Kobayashi, R.; Normand, J.; Raghavachari, K.; Rendell, A.; Burant, J. C.; Iyengar, S. S.; Tomasi, J.; Cossi, M.; Rega, N.; Millam, N. J.; Klene, M.; Knox, J. E.; Cross, J. B.; Bakken, V.; Adamo, C.; Jaramillo, J.; Gomperts, R.; Stratmann, R. E.; Yazyev, O.; Austin, A. J.; Cammi, R.; Pomelli, C.; Ochterski, J. W.; Martin, R. L.; Morokuma, K.; Zakrzewski, V. G.; Voth, G. A.; Salvador, P.; Dannenberg, J. J.; Dapprich, S.; Daniels, A. D.; Farkas, Ö.; Foresman, J. B.; Ortiz, J. V.; Cioslowski, J.; Fox, D. J. Gaussian, Inc., Wallingford CT, 2009.

(1) Hadebe, S. W.; Robinson, R. S. *Eur. J. Org. Chem.* **2006**, 4898–4904.

(2) Abbey, E. R.; Zakharov, L. N.; Liu, S.-Y. *J. Am. Chem. Soc.* **2011**, *133*, 11508–11511.

(3) Connelly, N. G.; W. E. Geiger. *Chem. Rev.* **1996**, *96*, 877–910.

**Electrophilic aromatic substitution (EAS) reaction of “external” BN indole I (Figure 5, eq 2)**

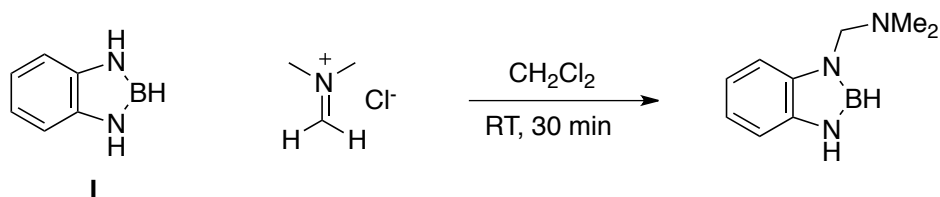

To a 5-mL vial charged with “external” BN indole **I** (23.6 mg, 0.200 mmol) and CH<sub>2</sub>Cl<sub>2</sub> (2.0 mL) was added dimethylmethylenimine chloride (28.0 mg, 0.300 mmol). The resulting mixture was allowed to stir at room temperature for 0.5 h. The mixture was then passed through an Acrodisc (0.45 μm, PTFE) to remove unreacted iminium salt. Triethylamine (0.1 mL, 0.7 mmol, 3.5 equiv) was then added to release free EAS adduct. After removal of the solvent under reduced pressure, the residue was extracted by ether (3 x 1 mL) to remove ammonium salts. The combined ethereal solution was then concentrated to afford the crude EAS adduct. <sup>1</sup>H NMR indicated the reaction was not complete. The molar ratio of **I** to EAS adduct is approximately 1.3:1. We were not able to isolate the EAS adduct by column chromatography due to its instability on either silica gel or alumina. Characteristic <sup>1</sup>H NMR and <sup>11</sup>B NMR chemical shifts for the EAS adduct: <sup>1</sup>H NMR (CD<sub>2</sub>Cl<sub>2</sub>, 500 MHz) δ 4.36 (s, 2H, NCH<sub>2</sub>N), 2.26 (s, 6H, N(CH<sub>3</sub>)<sub>2</sub>); <sup>11</sup>B NMR (CD<sub>2</sub>Cl<sub>2</sub>, 160 MHz) δ 25.3 (d, <sup>2</sup>J<sub>HB</sub> = 166 Hz). HRMS (DART) calcd 176.13590 [(M + H)]<sup>+</sup>, found 176.13527.

**Electrophilic aromatic substitution reaction of “fused” BN indole II (Figure 5, eq 3)**

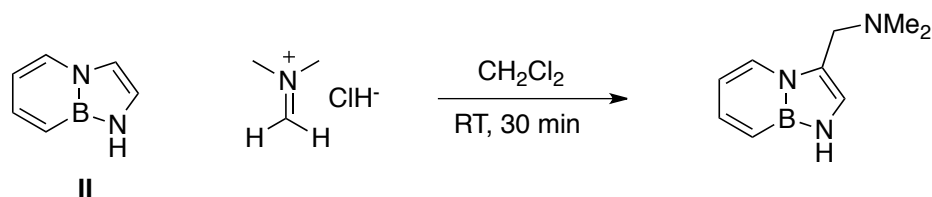

To a 5-mL vial charged with “fused” BN indole **II** (23.6 mg, 0.200 mmol) and CH<sub>2</sub>Cl<sub>2</sub> (2.0 mL) was added dimethylmethylenimine chloride (28.0 mg, 0.300 mmol). The resulting mixture was allowed to stir at room temperature for 0.5 h. After removal of the solvent under reduced pressure, the resulting crude residue was purified by column chromatography on silica gel with Et<sub>2</sub>O/Et<sub>3</sub>N (80/20) as the eluent to afford the desired EAS adduct as white solid (33.3 mg, 95%).

Single crystals suitable for X-ray diffraction analysis were obtained by slow evaporation of a concentrated solution of BN gramine in Et<sub>2</sub>O at -35 °C.

<sup>1</sup>H NMR (CD<sub>2</sub>Cl<sub>2</sub>, 500 MHz) δ 8.02 (d, *J* = 6.5 Hz, 1H), 7.56 (dd, *J* = 6.0, 1.5 Hz, 1H), 6.69-6.72 (m, 2H), 6.48 (brs, 1H), 6.37 (td, *J* = 6.5, 1.0 Hz, 1H), 3.51 (s, 2H), 2.21 (s, 6H); <sup>13</sup>C NMR (CD<sub>2</sub>Cl<sub>2</sub>, 150 MHz) δ 138.8, 128.3, 120.9, 119.2, 117.1 (br), 108.5, 55.1, 45.3; <sup>11</sup>B NMR (CD<sub>2</sub>Cl<sub>2</sub>, 162 MHz) δ 23.5; IR (ATR) 3265, 2975, 2943, 2818, 2711, 1623, 1583, 1495, 1466, 1449, 1384, 1339, 1307, 1276, 1248, 1226, 1169, 1144, 1095, 1081, 1035, 996, 845, 813, 708, 692 cm<sup>-1</sup>.

**Electrophilic aromatic substitution reaction of indole (Figure 5, eq 4)**

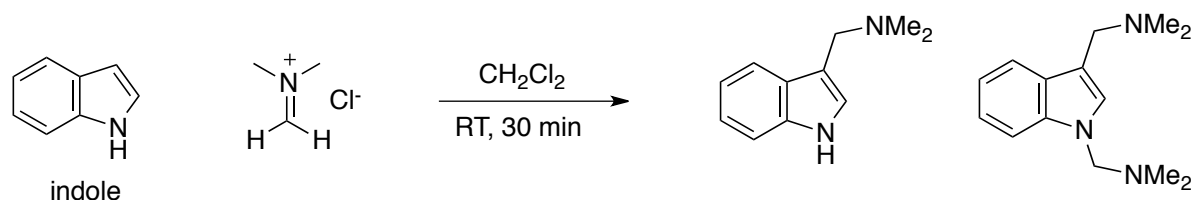

To a 5-mL vial charged with indole (23.4 mg, 0.200 mmol) and CH<sub>2</sub>Cl<sub>2</sub> (2.0 mL) was added dimethylmethyleniminium chloride (28.0 mg, 0.300 mmol). The resulting mixture was allowed to stir at room temperature for 0.5 h. After removal of the solvent under reduced pressure, the resulting crude residue was purified by column chromatography on silica gel with Et<sub>2</sub>O/Et<sub>3</sub>N (80/20) as the eluent to afford a mixture of gramine and bisalkylated indole (molar ratio: gramine : bisalkylated indole = 2.1: 1) as white solid (34.7 mg, total yield: 90%). The characterization data of gramine<sup>4</sup> and the bisalkylated indole<sup>5</sup> are consistent with those reported in the literature.

Gramine: <sup>1</sup>H NMR (CDCl<sub>3</sub>, 500 MHz) δ 8.35 (br s, 1H), 7.10 (d, *J* = 8.5 Hz, 1H), 7.34 (d, *J* = 8.5 Hz, 1H), 7.19 (td, *J* = 7.0, 1.0 Hz, 1H), 7.09-7.13 (m, 2H), 3.65 (s, 2H), 2.30 (s, 6H); bisalkylated indole: <sup>1</sup>H NMR (CDCl<sub>3</sub>, 500 MHz) δ 7.69 (d, *J* = 7.5 Hz, 1H), 7.43 (d, *J* = 8.5 Hz, 1H), 7.21 (td, *J* = 7.0, 1.0 Hz, 1H), 7.09-7.13 (m, 2H), 4.73 (s, 2H), 3.64 (s, 2H), 2.31 (s, 6H), 2.29 (s, 6H).

(4) Bandini, M.; Eichholzer, A. *Angew. Chem., Int. Ed.* **2009**, *48*, 9533–9538.

(5) Love, B. E. *J. Org. Chem.* **2006**, *72*, 630–632.

### Competitive Electrophilic Aromatic Substitution Experiments (Scheme 2)

**General procedueres.** To a 5-mL vial charged with 2 different indoles (0.05 mmol for each) and  $\text{CD}_2\text{Cl}_2$  (1.0 mL) was added dimethylmethyleneiminium chloride (4.7 mg, 0.05 mmol). The resulting mixture was allowed to stir at room temperature for 15 min. The crude  $^1\text{H}$  NMR and  $^{11}\text{B}$  NMR was then taken to identify relative reactivity between 2 indoles.

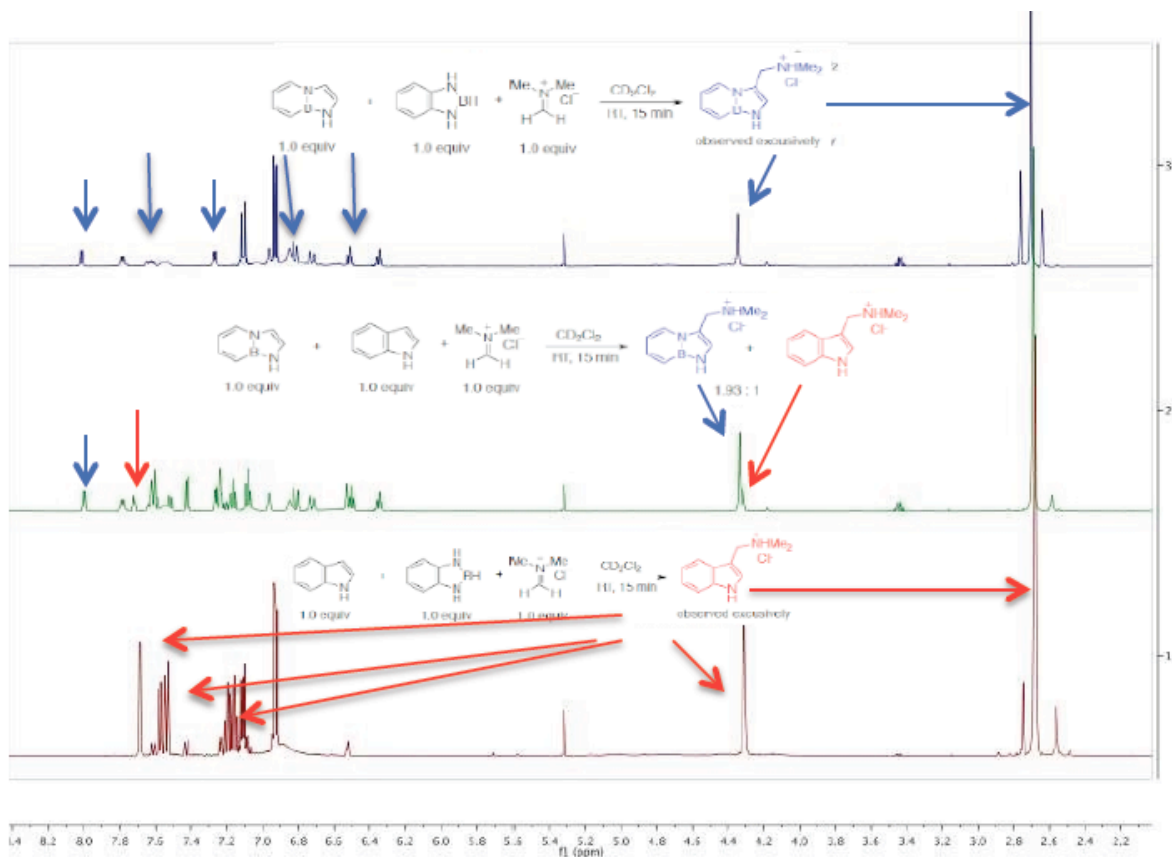

**Figure S1.** Competitive EAS experiments of “fused” BN indole vs. “external” BN indole (top); “fused” BN indole vs. indole (middle); indole vs. “external” BN indole (bottom). Red arrows point toward signals of the EAS adduct of indole; blue arrows point toward EAS adduct of “fused” BN indole.

Table S1. CAM-B3LYP/6-311G(d,p) geometrical parameters of **Indole**, **I** and **II** (bond angles in Å, angles in degrees).

|                   | 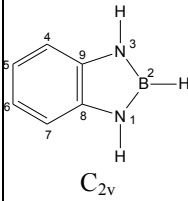 |  |  |
|-------------------|-----------------------------------------------------------------------------------|------------------------------------------------------------------------------------|-------------------------------------------------------------------------------------|
|                   | <b>I</b>                                                                          | <b>II</b>                                                                          | <b>Indole</b>                                                                       |
| <b>Distances:</b> |                                                                                   |                                                                                    |                                                                                     |
| 1 – 2             | 1.426                                                                             | 1.386                                                                              | 1.377                                                                               |
| 2 – 3             | 1.426                                                                             | 1.349                                                                              | 1.360                                                                               |
| 3 – 9             | 1.392                                                                             | 1.396                                                                              | 1.435                                                                               |
| 9 – 8             | 1.406                                                                             | 1.454                                                                              | 1.411                                                                               |
| 8 – 1             | 1.392                                                                             | 1.435                                                                              | 1.375                                                                               |
| 9 – 4             | 1.384                                                                             | 1.361                                                                              | 1.400                                                                               |
| 4 – 5             | 1.391                                                                             | 1.358                                                                              | 1.379                                                                               |
| 5 – 6             | 1.391                                                                             | 1.428                                                                              | 1.404                                                                               |
| 6 – 7             | 1.391                                                                             | 1.365                                                                              | 1.379                                                                               |
| 7 – 8             | 1.384                                                                             | 1.504                                                                              | 1.394                                                                               |
| <b>Angles:</b>    |                                                                                   |                                                                                    |                                                                                     |
| 4-9-3             | 131.2                                                                             | 128.7                                                                              | 134.3                                                                               |
| 3-9-8             | 108.0                                                                             | 108.9                                                                              | 106.9                                                                               |
| 8-9-4             | 120.8                                                                             | 122.4                                                                              | 118.9                                                                               |
| 9-3-2             | 109.3                                                                             | 108.3                                                                              | 107.0                                                                               |
| 3-2-1             | 105.3                                                                             | 110.4                                                                              | 109.7                                                                               |
| 2-1-8             | 109.3                                                                             | 108.7                                                                              | 109.2                                                                               |
| 1-8-9             | 108.0                                                                             | 103.7                                                                              | 107.3                                                                               |
| 1-8-7             | 131.2                                                                             | 139.1                                                                              | 130.5                                                                               |
| 7-8-9             | 120.8                                                                             | 117.2                                                                              | 122.2                                                                               |
| 8-7-6             | 118.3                                                                             | 116.4                                                                              | 117.5                                                                               |
| 7-6-5             | 121.0                                                                             | 122.9                                                                              | 121.2                                                                               |
| 6-5-4             | 121.0                                                                             | 121.3                                                                              | 121.1                                                                               |
| 5-4-9             | 118.3                                                                             | 119.8                                                                              | 119.1                                                                               |

Table S2. Atomic coordinates for [CAM-B3LYP/6-311G(d,p)] optimized geometry, value of total energy of Indol

|   |           |           |          |
|---|-----------|-----------|----------|
| 6 | 1.775070  | -1.391599 | 0.000000 |
| 6 | 0.425124  | -1.671498 | 0.000000 |
| 6 | -0.489982 | -0.612269 | 0.000000 |
| 6 | 0.000000  | 0.711320  | 0.000000 |
| 6 | 1.363939  | 0.998902  | 0.000000 |
| 6 | 2.240222  | -0.066421 | 0.000000 |
| 6 | -1.922114 | -0.526228 | 0.000000 |
| 6 | -2.240980 | 0.795439  | 0.000000 |
| 7 | -1.089311 | 1.550160  | 0.000000 |
| 1 | 2.492652  | -2.203129 | 0.000000 |
| 1 | 0.074780  | -2.697215 | 0.000000 |
| 1 | 1.725270  | 2.020803  | 0.000000 |
| 1 | 3.307118  | 0.121768  | 0.000000 |
| 1 | -2.621778 | -1.346444 | 0.000000 |
| 1 | -3.207834 | 1.273228  | 0.000000 |
| 1 | -1.052706 | 2.553987  | 0.000000 |

$E_{\text{TOT}} = -363,702677211 \text{ au}$

Table S3. Atomic coordinates for [CAM-B3LYP/6-311G(d,p)] optimized geometry, value of total energy of Molecule I.

|   |          |           |           |
|---|----------|-----------|-----------|
| 6 | 0.000000 | 0.695670  | -2.125095 |
| 6 | 0.000000 | 1.411130  | -0.932481 |
| 6 | 0.000000 | 0.702831  | 0.256963  |
| 6 | 0.000000 | -0.702831 | 0.256963  |
| 6 | 0.000000 | -1.411130 | -0.932481 |
| 6 | 0.000000 | -0.695670 | -2.125095 |
| 5 | 0.000000 | 0.000000  | 2.445277  |
| 7 | 0.000000 | -1.133195 | 1.580293  |
| 7 | 0.000000 | 1.133195  | 1.580293  |
| 1 | 0.000000 | 1.231628  | -3.066235 |
| 1 | 0.000000 | 2.494971  | -0.935192 |
| 1 | 0.000000 | -2.494971 | -0.935192 |
| 1 | 0.000000 | -1.231628 | -3.066235 |
| 1 | 0.000000 | 0.000000  | 3.628185  |
| 1 | 0.000000 | -2.110187 | 1.815769  |
| 1 | 0.000000 | 2.110187  | 1.815769  |

$E_{\text{TOT}} = -367,189195686$  au



Table S4. Atomic coordinates for [CAM-B3LYP/6-311G(d,p)] optimized geometry, value of total energy of Molecule II.

|   |           |           |          |
|---|-----------|-----------|----------|
| 6 | -2.227892 | -0.044488 | 0.000000 |
| 6 | -1.334349 | 0.978127  | 0.000000 |
| 7 | 0.000000  | 0.709251  | 0.000000 |
| 5 | 0.520154  | -0.648085 | 0.000000 |
| 6 | -0.481714 | -1.769295 | 0.000000 |
| 6 | -1.798025 | -1.406407 | 0.000000 |
| 6 | 1.071945  | 1.604271  | 0.000000 |
| 6 | 2.217519  | 0.892430  | 0.000000 |
| 7 | 1.943309  | -0.465925 | 0.000000 |
| 1 | -3.284931 | 0.185491  | 0.000000 |
| 1 | -1.634172 | 2.019601  | 0.000000 |
| 1 | -0.235795 | -2.825669 | 0.000000 |
| 1 | -2.573124 | -2.167711 | 0.000000 |
| 1 | 0.933041  | 2.672927  | 0.000000 |
| 1 | 3.226624  | 1.272983  | 0.000000 |
| 1 | 2.679510  | -1.148309 | 0.000000 |

$E_{\text{TOT}} = -367,16106098 \text{ au}$

**Calculated UV-Vis Spectra** ( by [CAM-B3LYP/6-311++G(d,p)] with optimized geometry)

**Indole**

|                               |           |           |          |
|-------------------------------|-----------|-----------|----------|
| Excited State 1: Singlet-A'   | 5.0512 eV | 245.46 nm | f=0.0401 |
| Excited State 2: Singlet-A'   | 5.1020 eV | 243.01 nm | f=0.1085 |
| Excited State 3: Singlet-A''  | 5.1763 eV | 239.52 nm | f=0.0031 |
| Excited State 4: Singlet-A''  | 5.6469 eV | 219.56 nm | f=0.0050 |
| Excited State 5: Singlet-A''  | 5.7458 eV | 215.78 nm | f=0.0012 |
| Excited State 6: Singlet-A    | 5.7731 eV | 214.76 nm | f=0.0001 |
| Excited State 7: Singlet-A''  | 6.1133 eV | 202.81 nm | f=0.0072 |
| Excited State 8: Singlet-A'   | 6.2773 eV | 197.51 nm | f=0.5347 |
| Excited State 9: Singlet-A''  | 6.2786 eV | 197.47 nm | f=0.0155 |
| Excited State 10: Singlet-A'' | 6.3673 eV | 194.72 nm | f=0.0029 |
| Excited State 11: Singlet-A'' | 6.4251 eV | 192.97 nm | f=0.0038 |
| Excited State 12: Singlet-A'  | 6.5405 eV | 189.56 nm | f=0.3216 |
| Excited State 13: Singlet-A'' | 6.6633 eV | 186.07 nm | f=0.0047 |
| Excited State 14: Singlet-A'  | 6.7206 eV | 184.48 nm | f=0.0688 |
| Excited State 15: Singlet-A'' | 6.7966 eV | 182.42 nm | f=0.0090 |
| Excited State 16: Singlet-A'' | 6.8352 eV | 181.39 nm | f=0.0003 |
| Excited State 17: Singlet-A'  | 6.9993 eV | 177.14 nm | f=0.0512 |
| Excited State 18: Singlet-A'' | 7.0525 eV | 175.80 nm | f=0.0003 |
| Excited State 19: Singlet-A'  | 7.1101 eV | 174.38 nm | f=0.1932 |
| Excited State 20: Singlet-A'' | 7.1304 eV | 173.88 nm | f=0.0016 |

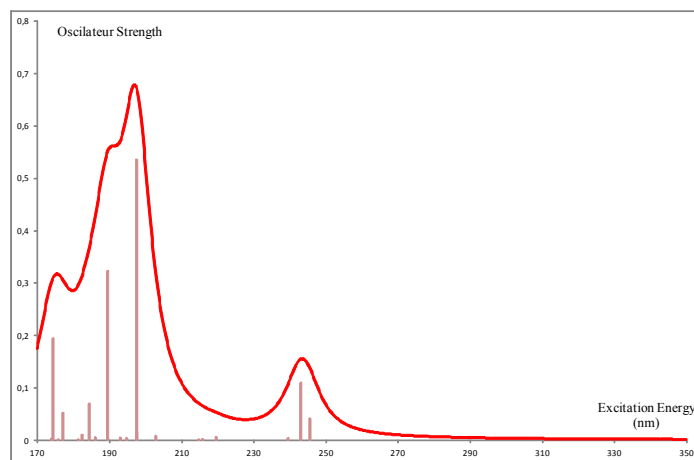

Figure S2: UV-Vis spectrum of **Indole**

### External BN Indole I

|                              |           |           |          |
|------------------------------|-----------|-----------|----------|
| Excited State 1: Singlet-A1  | 5.0154 eV | 247.21 nm | f=0.1108 |
| Excited State 2: Singlet-B1  | 5.3816 eV | 230.39 nm | f=0.0081 |
| Excited State 3: Singlet-B2  | 5.5780 eV | 222.27 nm | f=0.0043 |
| Excited State 4: Singlet-A2  | 5.6394 eV | 219.85 nm | f=0.0000 |
| Excited State 5: Singlet-B1  | 5.8765 eV | 210.98 nm | f=0.0019 |
| Excited State 6: Singlet-A2  | 5.9610 eV | 207.99 nm | f=0.0000 |
| Excited State 7: Singlet-B1  | 6.2121 eV | 199.58 nm | f=0.0042 |
| Excited State 8: Singlet-A1  | 6.3460 eV | 195.37 nm | f=0.2592 |
| Excited State 9: Singlet-A2  | 6.3657 eV | 194.77 nm | f=0.0000 |
| Excited State 10: Singlet-B2 | 6.4353 eV | 192.66 nm | f=0.3276 |
| Excited State 11: Singlet-B1 | 6.4664 eV | 191.74 nm | f=0.0018 |
| Excited State 12: Singlet-A2 | 6.4696 eV | 191.64 nm | f=0.0000 |
| Excited State 13: Singlet-B1 | 6.6657 eV | 186.00 nm | f=0.0186 |
| Excited State 14: Singlet-A1 | 6.7733 eV | 183.05 nm | f=0.5284 |
| Excited State 15: Singlet-B1 | 6.8635 eV | 180.64 nm | f=0.0129 |
| Excited State 16: Singlet-A2 | 7.0084 eV | 176.91 nm | f=0.0000 |
| Excited State 17: Singlet-A1 | 7.0955 eV | 174.74 nm | f=0.1011 |
| Excited State 18: Singlet-A2 | 7.1396 eV | 173.66 nm | f=0.0000 |
| Excited State 19: Singlet-B2 | 7.1555 eV | 173.27 nm | f=0.0151 |
| Excited State 20: Singlet-B1 | 7.2384 eV | 171.29 nm | f=0.0012 |

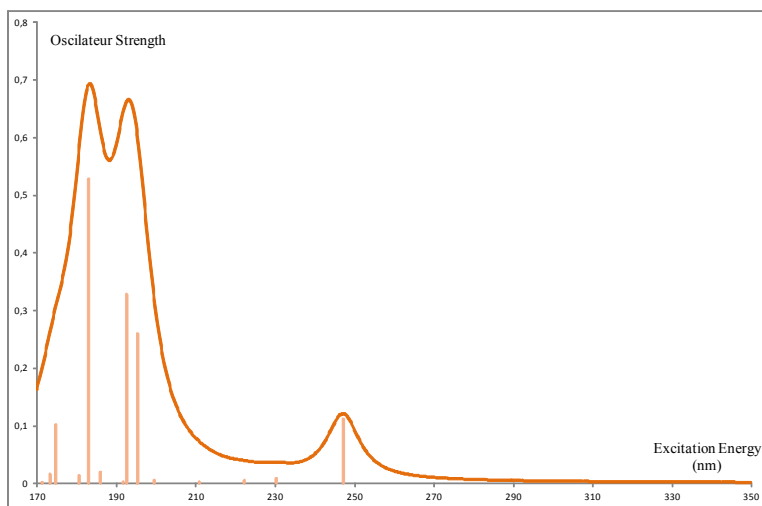

Figure S3: UV-Vis spectrum of I.

## ***Fused BN Indole II***

|                               |           |           |          |
|-------------------------------|-----------|-----------|----------|
| Excited State 1: Singlet-A'   | 4.8408 eV | 256.12 nm | f=0.1600 |
| Excited State 2: Singlet-A'   | 5.0935 eV | 243.41 nm | f=0.0819 |
| Excited State 3: Singlet-A''  | 5.1629 eV | 240.14 nm | f=0.0041 |
| Excited State 4: Singlet-A''  | 5.5313 eV | 224.15 nm | f=0.0025 |
| Excited State 5: Singlet-A''  | 5.6809 eV | 218.25 nm | f=0.0140 |
| Excited State 6: Singlet-A''  | 5.8460 eV | 212.08 nm | f=0.0009 |
| Excited State 7: Singlet-A''  | 5.9269 eV | 209.19 nm | f=0.0043 |
| Excited State 8: Singlet-A''  | 6.1001 eV | 203.25 nm | f=0.0055 |
| Excited State 9: Singlet-A'   | 6.2266 eV | 199.12 nm | f=0.2130 |
| Excited State10: Singlet-A'   | 6.3480 eV | 195.31 nm | f=0.2434 |
| Excited State 11: Singlet-A'' | 6.3608eV  | 194.92 nm | f=0.0158 |
| Excited State 12: Singlet-A'' | 6.3872 eV | 194.11 nm | f=0.0008 |
| Excited State 13: Singlet-A'' | 6.5303 eV | 189.86 nm | f=0.0010 |
| Excited State 14: Singlet-A'' | 6.5853 eV | 188.27 nm | f=0.0068 |
| Excited State 15: Singlet-A'' | 6.6145 eV | 187.44 nm | f=0.0013 |
| Excited State 16: Singlet-A'  | 6.6182 eV | 187.34 nm | f=0.0563 |
| Excited State 17: Singlet-A'' | 6.6529 eV | 186.36 nm | f=0.0021 |
| Excited State 18: Singlet-A'  | 6.8437 eV | 181.16 nm | f=0.0210 |
| Excited State 19: Singlet-A'  | 6.9039 eV | 179.59 nm | f=0.2411 |
| Excited State 20: Singlet-A'  | 7.0657 eV | 175.47 nm | f=0.0094 |

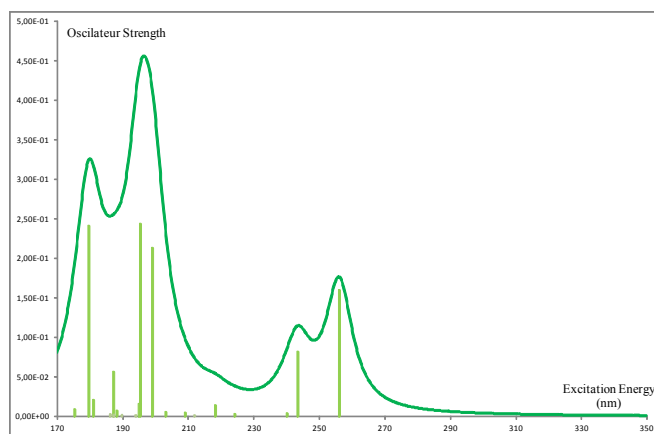

Figure S4: UV-Vis spectrum of **II**.

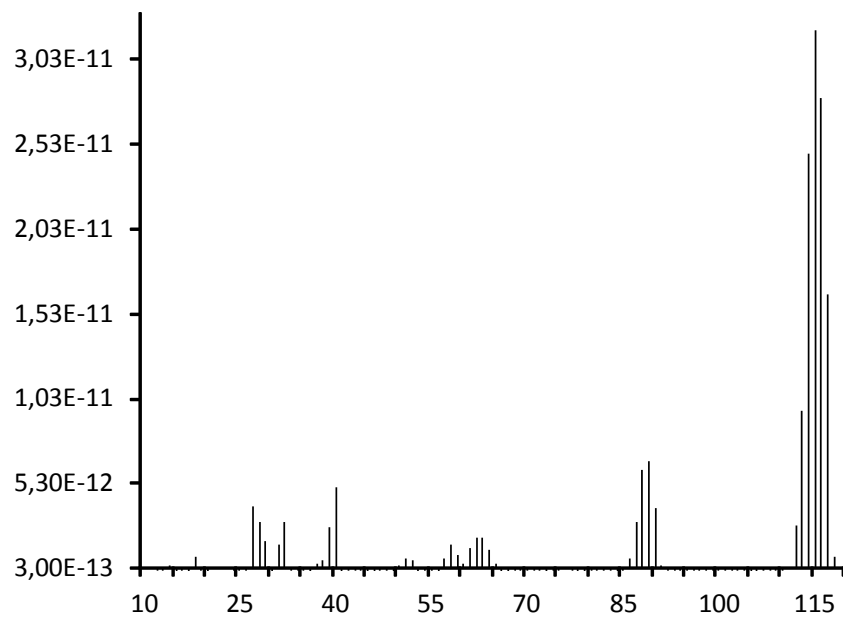

Figure S5: Mass spectrum of **I**.

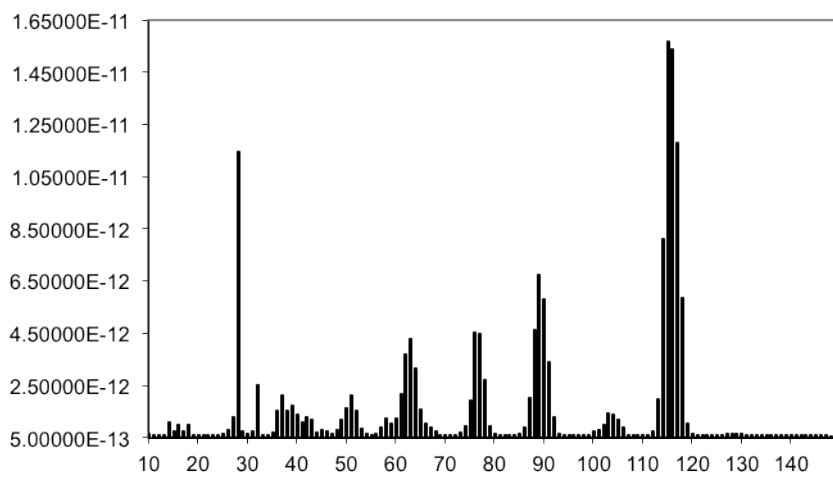

Figure S6: Mass spectrum of **II**.

**Calculated Mulliken Charges [CAM-B3LYP/6-311G(d,p)]**

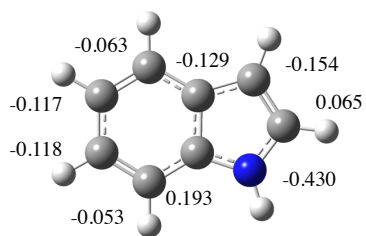

indole

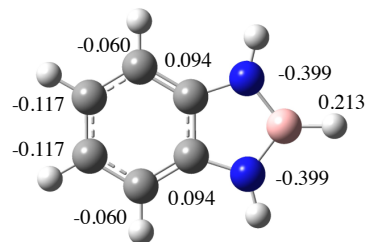

BN indole I

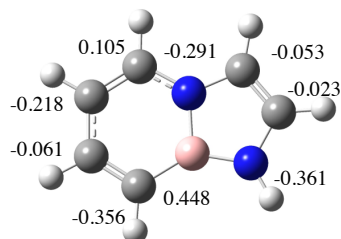

BN indole II

**Calculated Natural Charges [CAM-B3LYP/6-311G(d,p)]**

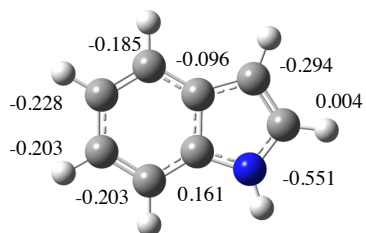

indole

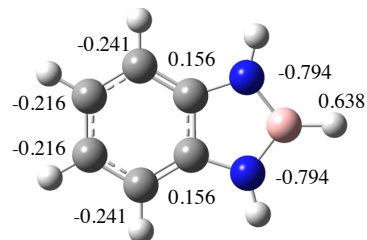

BN indole I

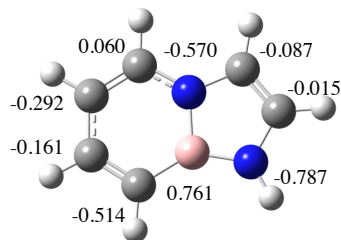

BN indole II

*Crystal structure of “fused” BN gramine.*

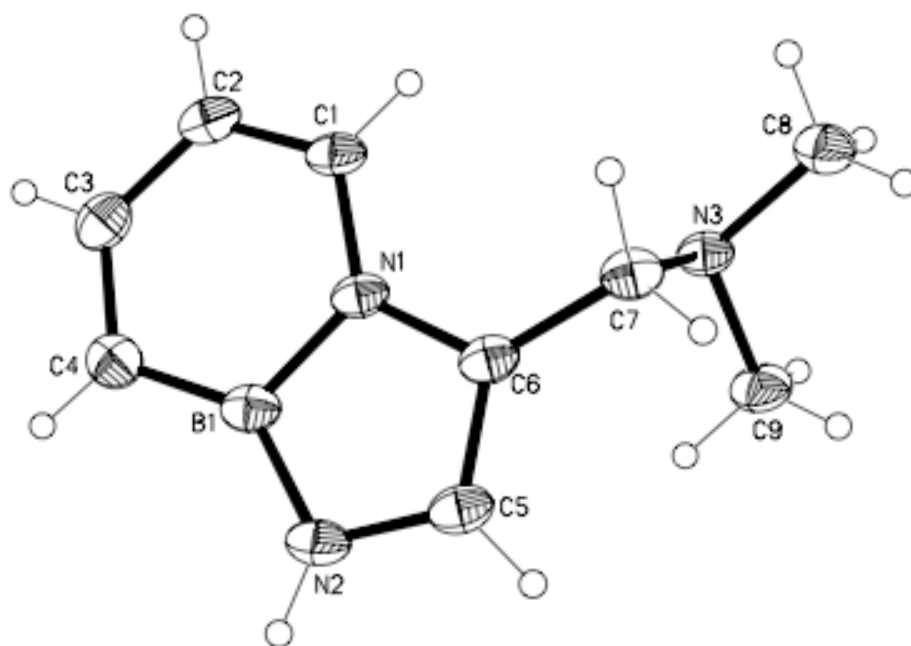

Table S5. Crystal data and structure refinement for BN gramine.

|                                   |                                             |                              |
|-----------------------------------|---------------------------------------------|------------------------------|
| Identification code               | C9H14BN3                                    |                              |
| Empirical formula                 | C9 H14 B N3                                 |                              |
| Formula weight                    | 175.04                                      |                              |
| Temperature                       | 100(2) K                                    |                              |
| Wavelength                        | 0.71073 Å                                   |                              |
| Crystal system                    | Monoclinic                                  |                              |
| Space group                       | P 21/c                                      |                              |
| Unit cell dimensions              | a = 10.0589(17) Å                           | $\alpha = 90^\circ$ .        |
|                                   | b = 8.5755(14) Å                            | $\beta = 102.345(4)^\circ$ . |
|                                   | c = 11.8802(18) Å                           | $\gamma = 90^\circ$ .        |
| Volume                            | 1001.1(3) Å <sup>3</sup>                    |                              |
| Z                                 | 4                                           |                              |
| Density (calculated)              | 1.161 Mg/m <sup>3</sup>                     |                              |
| Absorption coefficient            | 0.071 mm <sup>-1</sup>                      |                              |
| F(000)                            | 376                                         |                              |
| Crystal size                      | 0.320 x 0.170 x 0.050 mm <sup>3</sup>       |                              |
| Theta range for data collection   | 2.073 to 30.486°.                           |                              |
| Index ranges                      | -14 ≤ h ≤ 13, -12 ≤ k ≤ 11, 0 ≤ l ≤ 16      |                              |
| Reflections collected             | 5326                                        |                              |
| Independent reflections           | 2838 [R(int) = 0.0604]                      |                              |
| Completeness to theta = 28.000°   | 100.0 %                                     |                              |
| Absorption correction             | Semi-empirical from equivalents             |                              |
| Max. and min. transmission        | 0.7461 and 0.4876                           |                              |
| Refinement method                 | Full-matrix least-squares on F <sup>2</sup> |                              |
| Data / restraints / parameters    | 2838 / 1 / 123                              |                              |
| Goodness-of-fit on F <sup>2</sup> | 1.080                                       |                              |
| Final R indices [I > 2σ(I)]       | R1 = 0.0551, wR2 = 0.1510                   |                              |
| R indices (all data)              | R1 = 0.0666, wR2 = 0.1576                   |                              |
| Extinction coefficient            | na                                          |                              |
| Largest diff. peak and hole       | 0.482 and -0.176 e. Å <sup>-3</sup>         |                              |



Table S6. Atomic coordinates ( $\times 10^4$ ) and equivalent isotropic displacement parameters ( $\text{\AA}^2 \times 10^3$ ) for BN gramine.  $U(\text{eq})$  is defined as one third of the trace of the orthogonalized  $U^{ij}$  tensor.

|      | x       | y        | z       | U(eq) |
|------|---------|----------|---------|-------|
| N(1) | 4400(1) | -3340(1) | 3807(1) | 21(1) |
| N(2) | 3894(1) | -5225(1) | 2420(1) | 26(1) |
| N(3) | 7686(1) | -2707(1) | 4254(1) | 22(1) |
| C(1) | 4237(1) | -2108(1) | 4505(1) | 24(1) |
| C(2) | 2997(1) | -1383(2) | 4335(1) | 28(1) |
| C(3) | 1874(1) | -1862(2) | 3452(1) | 29(1) |
| C(4) | 1945(1) | -3094(1) | 2725(1) | 27(1) |
| C(5) | 5234(1) | -5381(1) | 3020(1) | 25(1) |
| C(6) | 5570(1) | -4273(1) | 3852(1) | 22(1) |
| C(7) | 6902(1) | -3983(1) | 4656(1) | 24(1) |
| C(8) | 8846(1) | -2277(2) | 5176(1) | 29(1) |
| C(9) | 8189(1) | -3218(2) | 3237(1) | 30(1) |
| B(1) | 3295(1) | -3927(2) | 2895(1) | 23(1) |

Table S7. Bond lengths [ $\text{\AA}$ ] and angles [ $^\circ$ ] for BN gramine.

---

|            |            |
|------------|------------|
| N(1)-C(1)  | 1.3740(13) |
| N(1)-C(6)  | 1.4147(14) |
| N(1)-B(1)  | 1.4654(16) |
| N(2)-C(5)  | 1.3898(16) |
| N(2)-B(1)  | 1.4378(16) |
| N(2)-H(2N) | 0.881(12)  |
| N(3)-C(8)  | 1.4663(15) |
| N(3)-C(9)  | 1.4737(13) |
| N(3)-C(7)  | 1.4859(14) |
| C(1)-C(2)  | 1.3690(17) |
| C(1)-H(1)  | 0.9500     |
| C(2)-C(3)  | 1.4278(18) |
| C(2)-H(2)  | 0.9500     |
| C(3)-C(4)  | 1.3767(16) |
| C(3)-H(3)  | 0.9500     |
| C(4)-B(1)  | 1.5092(18) |
| C(4)-H(4)  | 0.9500     |
| C(5)-C(6)  | 1.3607(16) |
| C(5)-H(5)  | 0.9500     |
| C(6)-C(7)  | 1.4906(16) |
| C(7)-H(7A) | 0.9900     |
| C(7)-H(7B) | 0.9900     |
| C(8)-H(8A) | 0.9800     |
| C(8)-H(8B) | 0.9800     |
| C(8)-H(8C) | 0.9800     |

|                 |            |
|-----------------|------------|
| C(9)-H(9A)      | 0.9800     |
| C(9)-H(9B)      | 0.9800     |
| C(9)-H(9C)      | 0.9800     |
| C(1)-N(1)-C(6)  | 128.16(10) |
| C(1)-N(1)-B(1)  | 122.74(10) |
| C(6)-N(1)-B(1)  | 109.07(9)  |
| C(5)-N(2)-B(1)  | 108.34(10) |
| C(5)-N(2)-H(2N) | 124.7(9)   |
| B(1)-N(2)-H(2N) | 126.9(9)   |
| C(8)-N(3)-C(9)  | 109.25(9)  |
| C(8)-N(3)-C(7)  | 109.74(8)  |
| C(9)-N(3)-C(7)  | 110.09(9)  |
| C(2)-C(1)-N(1)  | 118.84(11) |
| C(2)-C(1)-H(1)  | 120.6      |
| N(1)-C(1)-H(1)  | 120.6      |
| C(1)-C(2)-C(3)  | 122.07(11) |
| C(1)-C(2)-H(2)  | 119.0      |
| C(3)-C(2)-H(2)  | 119.0      |
| C(4)-C(3)-C(2)  | 122.83(11) |
| C(4)-C(3)-H(3)  | 118.6      |
| C(2)-C(3)-H(3)  | 118.6      |
| C(3)-C(4)-B(1)  | 116.45(11) |
| C(3)-C(4)-H(4)  | 121.8      |
| B(1)-C(4)-H(4)  | 121.8      |
| C(6)-C(5)-N(2)  | 111.63(10) |
| C(6)-C(5)-H(5)  | 124.2      |

|                  |            |
|------------------|------------|
| N(2)-C(5)-H(5)   | 124.2      |
| C(5)-C(6)-N(1)   | 106.99(10) |
| C(5)-C(6)-C(7)   | 129.17(11) |
| N(1)-C(6)-C(7)   | 123.79(10) |
| N(3)-C(7)-C(6)   | 112.54(9)  |
| N(3)-C(7)-H(7A)  | 109.1      |
| C(6)-C(7)-H(7A)  | 109.1      |
| N(3)-C(7)-H(7B)  | 109.1      |
| C(6)-C(7)-H(7B)  | 109.1      |
| H(7A)-C(7)-H(7B) | 107.8      |
| N(3)-C(8)-H(8A)  | 109.5      |
| N(3)-C(8)-H(8B)  | 109.5      |
| H(8A)-C(8)-H(8B) | 109.5      |
| N(3)-C(8)-H(8C)  | 109.5      |
| H(8A)-C(8)-H(8C) | 109.5      |
| H(8B)-C(8)-H(8C) | 109.5      |
| N(3)-C(9)-H(9A)  | 109.5      |
| N(3)-C(9)-H(9B)  | 109.5      |
| H(9A)-C(9)-H(9B) | 109.5      |
| N(3)-C(9)-H(9C)  | 109.5      |
| H(9A)-C(9)-H(9C) | 109.5      |
| H(9B)-C(9)-H(9C) | 109.5      |
| N(2)-B(1)-N(1)   | 103.97(10) |
| N(2)-B(1)-C(4)   | 138.97(11) |
| N(1)-B(1)-C(4)   | 117.06(10) |

---

Symmetry transformations used to generate equivalent atoms:

Table S8. Anisotropic displacement parameters ( $\text{\AA}^2 \times 10^3$ ) for BN gramine. The anisotropic displacement factor exponent takes the form:  $-2p^2[ h^2 a^*2U^{11} + \dots + 2 h k a^* b^* U^{12} ]$

|      | U <sup>11</sup> | U <sup>22</sup> | U <sup>33</sup> | U <sup>23</sup> | U <sup>13</sup> | U <sup>12</sup> |
|------|-----------------|-----------------|-----------------|-----------------|-----------------|-----------------|
| N(1) | 30(1)           | 19(1)           | 16(1)           | 1(1)            | 9(1)            | 0(1)            |
| N(2) | 36(1)           | 24(1)           | 18(1)           | -3(1)           | 7(1)            | -3(1)           |
| N(3) | 30(1)           | 23(1)           | 16(1)           | 0(1)            | 9(1)            | -1(1)           |
| C(1) | 35(1)           | 22(1)           | 17(1)           | -1(1)           | 10(1)           | -3(1)           |
| C(2) | 38(1)           | 24(1)           | 25(1)           | -2(1)           | 14(1)           | 2(1)            |
| C(3) | 32(1)           | 29(1)           | 29(1)           | 5(1)            | 12(1)           | 3(1)            |
| C(4) | 30(1)           | 29(1)           | 22(1)           | 3(1)            | 6(1)            | -3(1)           |
| C(5) | 35(1)           | 22(1)           | 20(1)           | 0(1)            | 11(1)           | 1(1)            |
| C(6) | 30(1)           | 20(1)           | 18(1)           | 2(1)            | 10(1)           | 0(1)            |
| C(7) | 33(1)           | 22(1)           | 18(1)           | 3(1)            | 9(1)            | 1(1)            |
| C(8) | 34(1)           | 31(1)           | 22(1)           | -3(1)           | 7(1)            | -2(1)           |
| C(9) | 36(1)           | 35(1)           | 21(1)           | -4(1)           | 14(1)           | -2(1)           |
| B(1) | 33(1)           | 22(1)           | 16(1)           | 2(1)            | 8(1)            | -2(1)           |

Table S9. Hydrogen coordinates ( $\times 10^4$ ) and isotropic displacement parameters ( $\text{\AA}^2 \times 10^{-3}$ ) for BN gramine.

|       | x        | y         | z        | U(eq) |
|-------|----------|-----------|----------|-------|
| H(2N) | 3497(13) | -5829(16) | 1845(11) | 31    |
| H(1)  | 4971     | -1766     | 5095     | 28    |
| H(2)  | 2881     | -536      | 4820     | 33    |
| H(3)  | 1041     | -1305     | 3363     | 35    |
| H(4)  | 1185     | -3403     | 2146     | 32    |
| H(5)  | 5840     | -6164     | 2867     | 30    |
| H(7A) | 6739     | -3711     | 5425     | 28    |
| H(7B) | 7449     | -4952     | 4737     | 28    |
| H(8A) | 9448     | -3179     | 5375     | 43    |
| H(8B) | 8515     | -1943     | 5856     | 43    |
| H(8C) | 9349     | -1420     | 4914     | 43    |
| H(9A) | 8668     | -2353     | 2956     | 45    |
| H(9B) | 7419     | -3543     | 2629     | 45    |
| H(9C) | 8816     | -4097     | 3448     | 45    |

Table S10. Torsion angles [°] for BN gramine.

---

|                     |             |
|---------------------|-------------|
| C(6)-N(1)-C(1)-C(2) | -178.16(10) |
| B(1)-N(1)-C(1)-C(2) | -0.84(15)   |
| N(1)-C(1)-C(2)-C(3) | -0.37(17)   |
| C(1)-C(2)-C(3)-C(4) | 1.14(18)    |
| C(2)-C(3)-C(4)-B(1) | -0.62(16)   |
| B(1)-N(2)-C(5)-C(6) | -0.47(12)   |
| N(2)-C(5)-C(6)-N(1) | 0.19(12)    |
| N(2)-C(5)-C(6)-C(7) | -177.54(9)  |
| C(1)-N(1)-C(6)-C(5) | 177.77(9)   |
| B(1)-N(1)-C(6)-C(5) | 0.16(11)    |
| C(1)-N(1)-C(6)-C(7) | -4.35(16)   |
| B(1)-N(1)-C(6)-C(7) | 178.04(9)   |
| C(8)-N(3)-C(7)-C(6) | 169.08(9)   |
| C(9)-N(3)-C(7)-C(6) | -70.63(12)  |
| C(5)-C(6)-C(7)-N(3) | 98.45(13)   |
| N(1)-C(6)-C(7)-N(3) | -78.94(11)  |
| C(5)-N(2)-B(1)-N(1) | 0.53(11)    |
| C(5)-N(2)-B(1)-C(4) | -178.75(13) |
| C(1)-N(1)-B(1)-N(2) | -178.19(8)  |
| C(6)-N(1)-B(1)-N(2) | -0.42(11)   |
| C(1)-N(1)-B(1)-C(4) | 1.28(15)    |
| C(6)-N(1)-B(1)-C(4) | 179.05(9)   |
| C(3)-C(4)-B(1)-N(2) | 178.70(12)  |
| C(3)-C(4)-B(1)-N(1) | -0.52(15)   |

---

Symmetry transformations used to generate equivalent atoms:

Table S11. Hydrogen bonds for BN gramine [ $\text{\AA}$  and  $^\circ$ ].

---

| D-H...A             | d(D-H)    | d(H...A)  | d(D...A)   | $\angle$ (DHA) |
|---------------------|-----------|-----------|------------|----------------|
| N(2)-H(2N)...N(3)#1 | 0.881(12) | 2.248(13) | 3.1079(14) | 165.2(12)      |

---

Symmetry transformations used to generate equivalent atoms:

#1  $-x+1, y-1/2, -z+1/2$



# NMR Spectra

sxu-11-195-5-H1

exp1 PROTON

```

SAMPLE          PRESATURATION
date Jun 21 2014 satmode n
solvent cdcl2  wet n
file /home/A11/Liu- SPECIAL
/Senbiao_Xu/sxu-11- temp 25.0
-195-5-H1.f10 gain 30
ACQUISITION    spin not used
sw 8012.8 hsc 8.000
at 2.045 pw90 8.900
np 32748 alfa 11.000
fb 4010
bs 2
dl 5.000 sn n
nt 16 dp y
ct 16 hs
TRANSMITTER    H1 fn
sfrq 493.885 DISPLAY not used
tof 499.9 sp -250.1
tpwr 59 wp 5248.6
pw 4.450 rfl 3398.0
DECOUPLER C13 rfp 2459.4
dn C13 rfp -132.2
dof 8 lp 0
ds nnn PLOT 0
decwave W40_MCM5m wc 250
dpcr 35 sc 0
dnf 32258 vs 289
a1 cdc ph 21
    
```

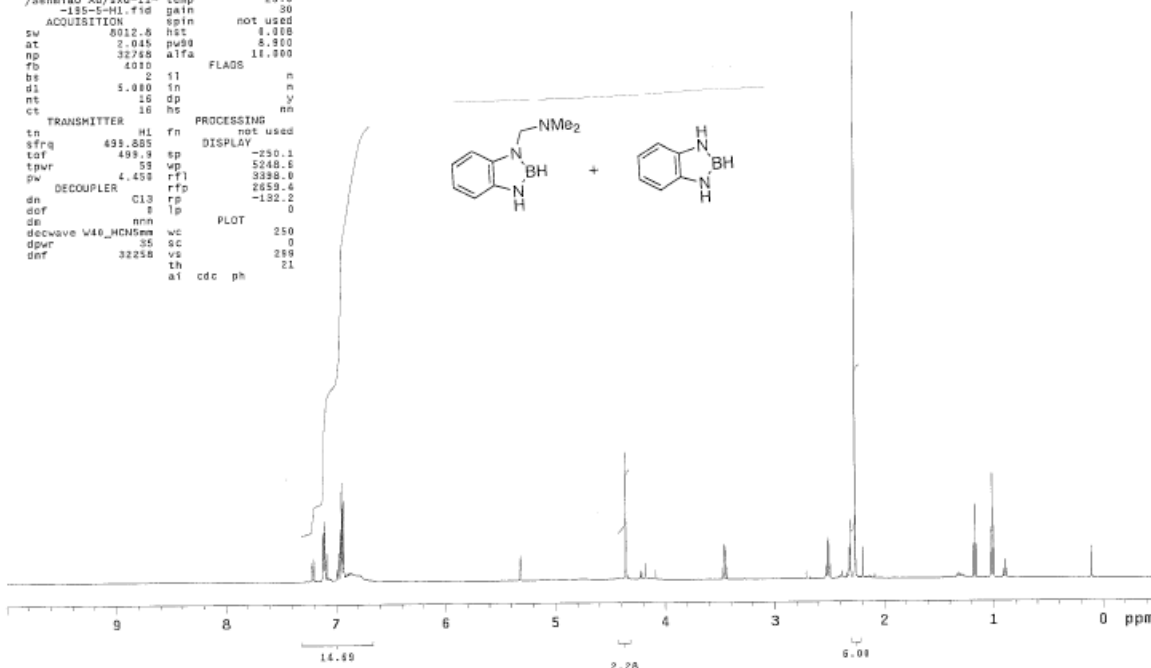

sxu-11-195-5-B11

exp1 BORDM\_11

```

SAMPLE          PRESATURATION
date Jun 21 2014 satmode n
solvent cdcl2  wet n
file /home/A11/Liu- SPECIAL
/Senbiao_Xu/sxu-11- temp 25.0
-195-5-B11.f10 gain 30
ACQUISITION    spin not used
sw 32051.3 hsc 0.000
at 0.629 pw90 11.900
np 1282 alfa 10.000
fb 17000
bs 2
dl 0.010 sn n
nt 1000 dp y
ct 1000 hs
TRANSMITTER    H1 fn
sfrq 611 fb 11.00
sfrq 160.382 fn 32760
tof 4817.4 DISPLAY -12631.1
tpwr 55 sp 28699.2
pw 11.910 rfl 15998.3
DECOUPLER H1 rfp -159.3
dn nnn lp 0
ds w PLOT 0
decwave 40 wc 250
dpcr 12961 sc 0
dnf 12961 vs 9804
a1 cdc ph 15
    
```

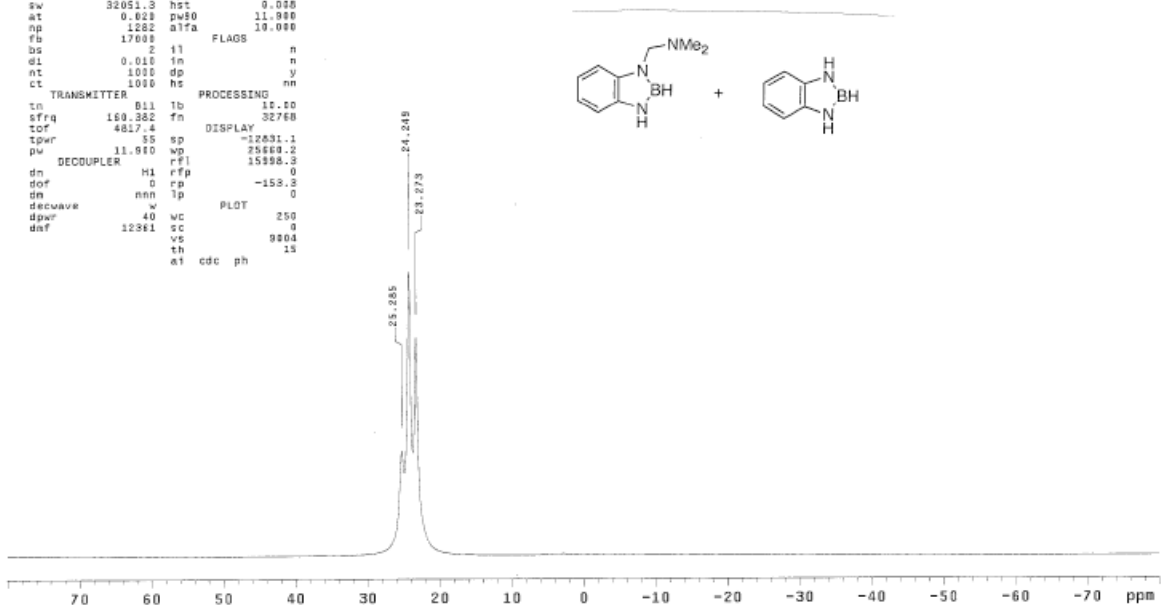

skx-11-195-2-H1

exp1 PROTON

```
SAMPLE      PRESATURATION
date Jun 10 2014 satmode n
solvent cd2cl2 wet n
file /home/All/Liu- /Senniao Xu/sku-11-195-2-H1.fid gain 25.1
ACQUISITION spin not used
sw 811.2 hz 0.008
at 2.045 pv90 8.908
np 32758 alfa 10.008
F2 4009 FLAGS
bs 2 f1 n
dl 5.000 in n
nt 1E dp y
ct 1E hs nn
TRANSMITTER H1 fn not used
sfrq 499.855 DISPLAY 0
tof 499.9 sp -250.1
tpwr 50 wp 5248.6
pw 4.450 rff 3872.0
DECOUPLER rfp 2859.4
dn C13 rp -132.5
dof 0 tp 0
dn non
decouple V40_HCNS98 wc 250
dprw 35 sc 0
dsf 32258 vs 567
at cdc ph 2
```

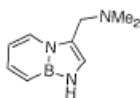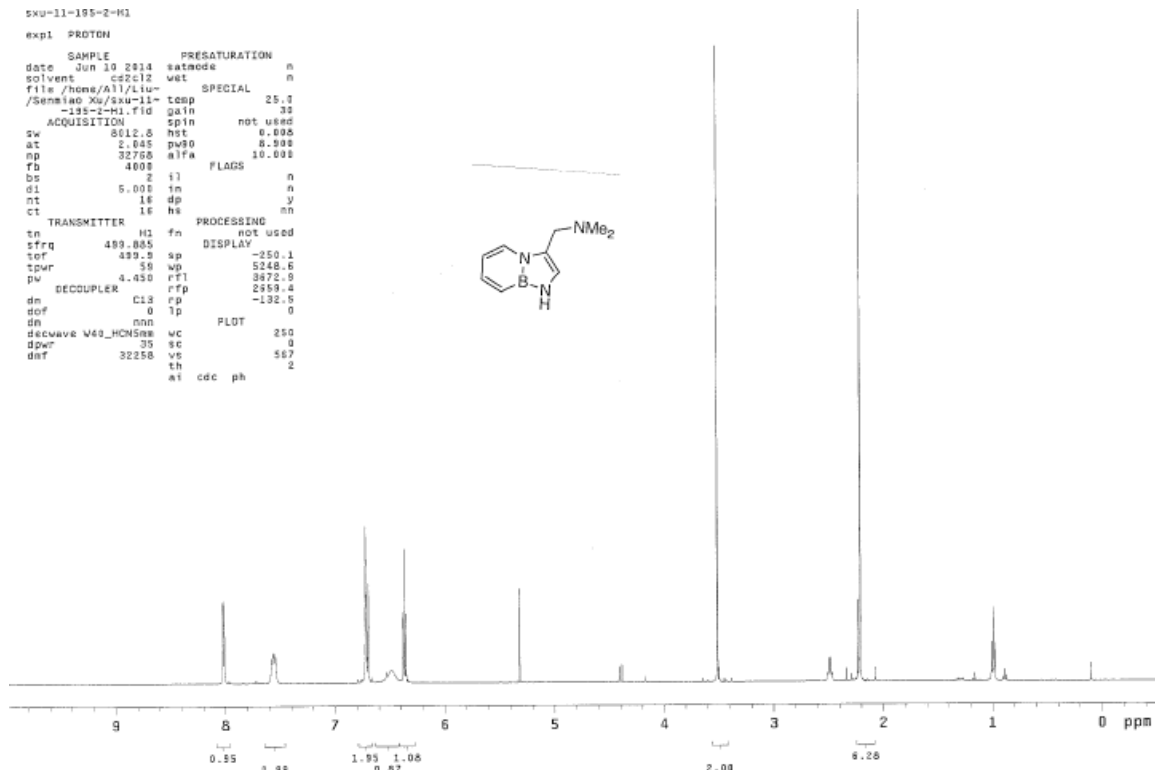

skx-11-195-2-C13

exp1 CARBON

```
SAMPLE      PRESATURATION
date Jun 18 2014 satmode n
solvent cd2cl2 wet n
file /home/All/Liu- /Senniao Xu/sku-11-195-2-C13.fid gain 25.0
ACQUISITION spin not used
sw 57878.8 hz 0.008
at 0.885 pv90 12.910
np 85538 alfa 10.010
F2 17098 FLAGS
bs 64 f1 n
dl 1.000 in n
nt 256 dp y
ct 256 hs nn
TRANSMITTER C13 fb PROCESSING 3.60
sfrq 150.898 fn not used
tof 2290.1 DISPLAY 0
tpwr 52 wp -2258.8
pw 8.450 rff 37877.6
DECOUPLER rfp 10403.7
dn H1 rfp 8162.7
dof 0 rp -56.2
dm yyy lp 0
decouple w PLOT 250
dprw 45 sc 0
dsf 16800 vs 55930
at cdc ph 9
```

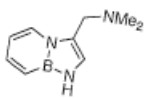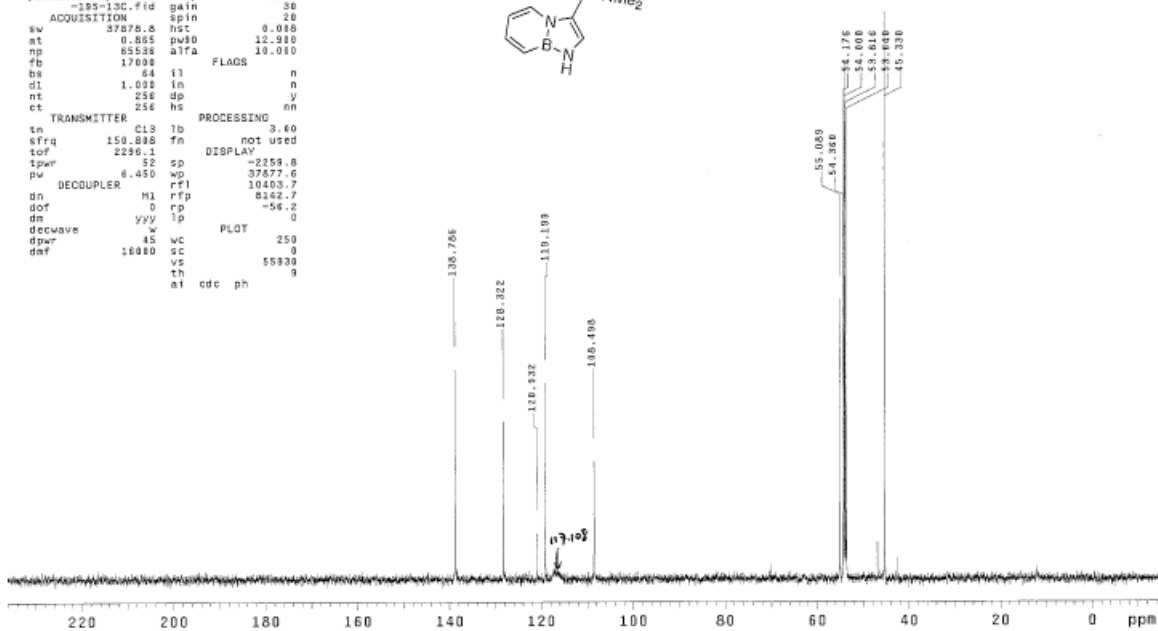

skx-11-195-2-811

exp1 BORON\_11

```
SAMPLE      PRESATURATION
date Jun 10 2014 satmode n
solvent cdc12 wet SPECIAL n
file /home/All/Liu~
/Senniad Xu/sku-11-
-195-2-811.fid gain 30
ACQUISITION spin not used
sw 32851.3 hst 0.000
at 8.320 pwsd 11.900
np 1282 alfa 10.000
fb 17000
bs 2 11 FLAGS n
d1 8.310 1n n
nt 1300 dp y
ct 1300 hs nn
TRANSMITTER      PROCESSING
tn 811 fb 10.00
sfrq 162.382 fn 32768
tof 4817.4 DISPLAY 32768
tpwr 55 sp -12831.1
pw 11.900 vp 25600.2
DECOUPLER H1 rfi 16994.1
dn 0 rfp 0
dof 3 rp -154.7
ds n lp 0
secwave w PLOT 250
dpr 43 wc 0
dxf 12361 vs 5478
th 21
a1 cdc ph
```

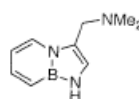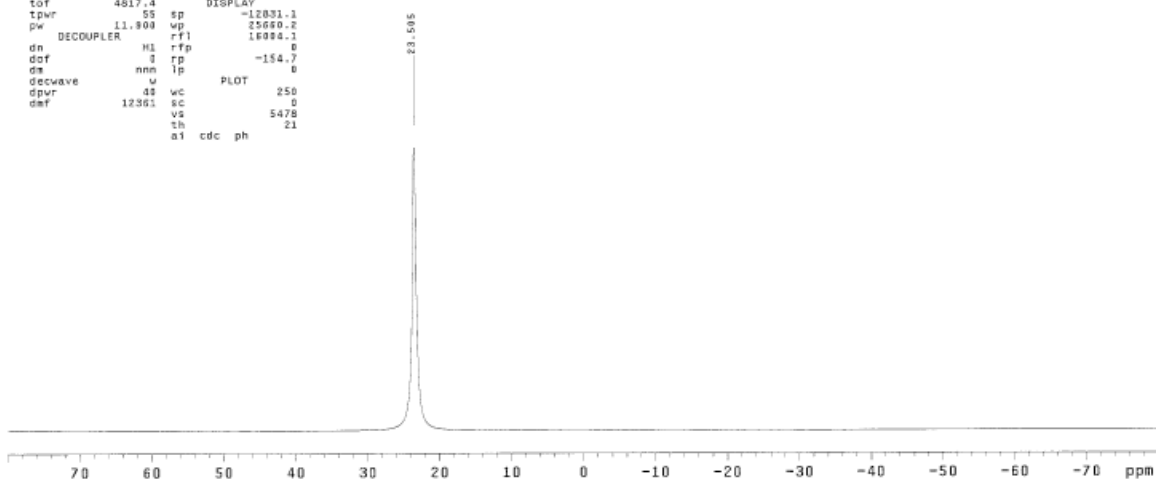

skx-11-195-3-M1

exp1 PROTON

```
SAMPLE      PRESATURATION
date Jun 10 2014 satmode n
solvent cdc13 wet SPECIAL n
file /home/All/Liu~
/Senniad Xu/sku-11-
-195-3-M1.fid gain 30
ACQUISITION spin not used
sw 5012.8 hst 0.000
at 2.045 pwsd 8.900
np 32768 alfa 10.000
fb 4000
bs 2 11 FLAGS n
d1 5.000 1n n
nt 16 dp y
ct 16 hs nn
TRANSMITTER      PROCESSING
tn H1 fn not used
sfrq 499.804 DISPLAY 32768
tof 499.8 sp -250.1
tpwr 59 vp 5248.5
pw 1.450 rfi 4635.3
DECOUPLER C13 rfp 3629.1
dn 0 rp 50.2
dof 0 lp 0
ds n lp 0
secwave V48_HCN5mm wc PLOT 250
dpr 35 sc 3
dxf 32268 vs 34
th 34
a1 cdc ph
```

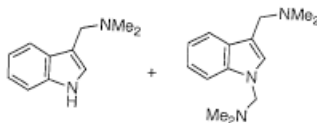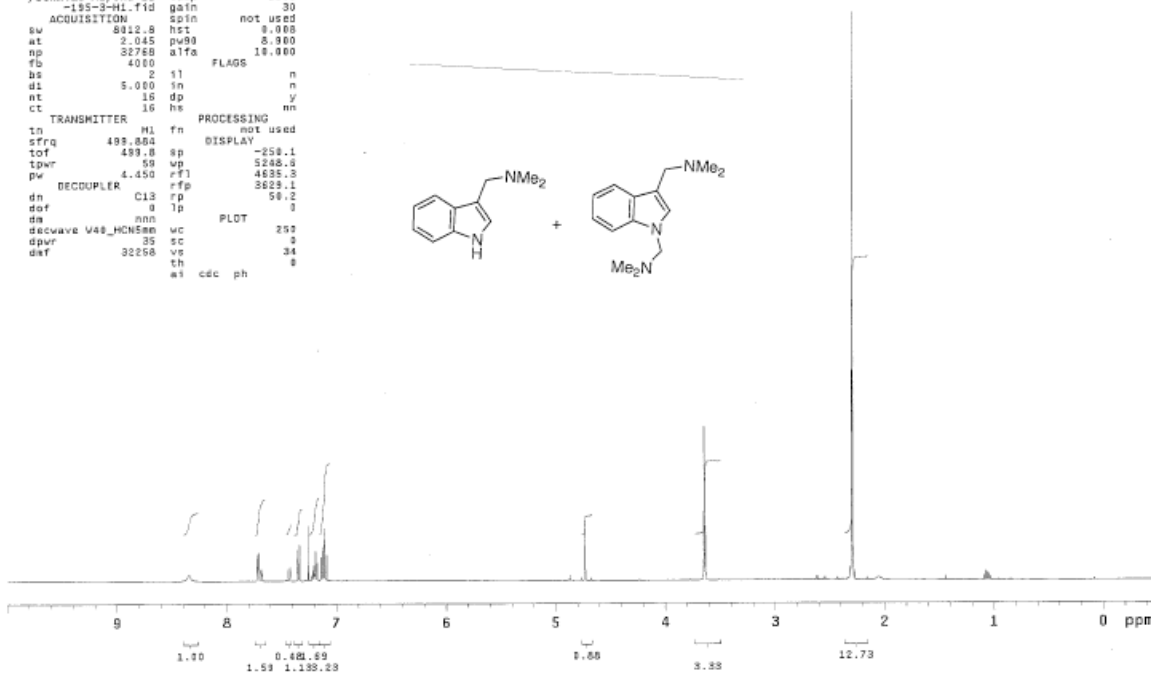

Supplement: ja5063899_si_001.pdf [file ja5063899_si_001.pdf]
